# Supplementary material for: Characteristics and Survival of Intensive Care Unit Patients with Coronavirus Disease in Osaka, Japan: A Retrospective Observational Study
Source: MDPI journal article supplement (doi:10.3390/jcm10112477), 2021-06-03
Supplement: s1 [file s1]

**Table S1.** Follow-up status of the patients at each period from the onset date.

| Period from the onset date                                | 10 days |         | 20 days |         | 30 days |         | 40 days |         | 50 days |         | 60 days |         | 70 days |         | 80 days |         | 90 days |         | 106 days |         | 138 days |         |
|-----------------------------------------------------------|---------|---------|---------|---------|---------|---------|---------|---------|---------|---------|---------|---------|---------|---------|---------|---------|---------|---------|----------|---------|----------|---------|
|                                                           | N       | (%)     | N        | (%)     | N        | (%)     |
| Survivors under follow-up                                 | 185     | (91.1)  | 128     | (63.1)  | 73      | (36.0)  | 37      | (18.2)  | 23      | (11.3)  | 12      | (5.9)   | 11      | (5.4)   | 9       | (4.4)   | 8       | (3.9)   | 3        | (1.5)   | 0        | (0.0)   |
| Subjects with hospital discharged alive or released alive | 6       | (3.0)   | 48      | (23.6)  | 85      | (41.9)  | 114     | (56.2)  | 124     | (61.1)  | 134     | (66.0)  | 135     | (66.5)  | 137     | (67.5)  | 138     | (68.0)  | 142      | (70.0)  | 145      | (71.4)  |
| Deaths                                                    | 12      | (5.9)   | 27      | (13.3)  | 45      | (22.2)  | 52      | (25.6)  | 56      | (27.6)  | 57      | (28.1)  | 57      | (28.1)  | 57      | (28.1)  | 57      | (28.1)  | 58       | (28.6)  | 58       | (28.6)  |
| Total <sup>a</sup>                                        | 203     | (100.0) | 203     | (100.0) | 203     | (100.0) | 203     | (100.0) | 203     | (100.0) | 203     | (100.0) | 203     | (100.0) | 203     | (100.0) | 203     | (100.0) | 203      | (100.0) | 203      | (100.0) |

<sup>a</sup> Of the 205 patients who were admitted to the intensive care unit, two patients were not recruited in the Cox regression analysis because the date of ICU admission was unknown or the discrepancy between the date of ICU admission and end of follow-up.
